# Supplementary material
Source: ML conference proceedings conference paper supplement (https://openreview.net/forum?id=4ndvumlZak)
Supplement: supplementary_material [file attachment]

# SUPPLEMENTARY MATERIAL

## Anonymous authors

Paper under double-blind review

## CONTENTS

|          |                                           |          |
|----------|-------------------------------------------|----------|
| <b>1</b> | <b>Code and datasets</b>                  | <b>2</b> |
| <b>2</b> | <b>Proof</b>                              | <b>2</b> |
| <b>3</b> | <b>Various forms of logical reasoning</b> | <b>4</b> |
| 3.1      | Generalized modus ponens . . . . .        | 4        |
| 3.1.1    | Basic schema . . . . .                    | 4        |
| 3.1.2    | Negative variant . . . . .                | 4        |
| 3.1.3    | Complex predicates . . . . .              | 4        |
| 3.1.4    | De Morgan . . . . .                       | 4        |
| 3.2      | Generalized contraposition . . . . .      | 5        |
| 3.2.1    | Basic schema . . . . .                    | 5        |
| 3.2.2    | Negative variant . . . . .                | 5        |
| 3.2.3    | Complex predicates . . . . .              | 5        |
| 3.2.4    | De Morgan . . . . .                       | 5        |
| 3.3      | Hypothetical syllogism 1 . . . . .        | 5        |
| 3.3.1    | Basic schema . . . . .                    | 5        |
| 3.3.2    | Negative variant . . . . .                | 5        |
| 3.3.3    | Complex predicates . . . . .              | 5        |
| 3.3.4    | De Morgan . . . . .                       | 5        |
| 3.4      | Hypothetical syllogism 2 . . . . .        | 5        |
| 3.4.1    | Basic schema . . . . .                    | 5        |
| 3.4.2    | Negative variant . . . . .                | 5        |
| 3.4.3    | Complex predicates . . . . .              | 6        |
| 3.4.4    | De Morgan . . . . .                       | 6        |
| 3.5      | Hypothetical syllogism 3 . . . . .        | 6        |
| 3.5.1    | Basic schema . . . . .                    | 6        |
| 3.5.2    | Negative variant . . . . .                | 6        |
| 3.5.3    | Complex predicates . . . . .              | 6        |
| 3.5.4    | De Morgan . . . . .                       | 6        |
| 3.6      | Generalized modus tollens . . . . .       | 6        |
| 3.6.1    | Basic schema . . . . .                    | 6        |

|     |          |                                                     |          |
|-----|----------|-----------------------------------------------------|----------|
| 054 | 3.6.2    | Negative variant . . . . .                          | 6        |
| 055 | 3.6.3    | Complex predicates . . . . .                        | 6        |
| 056 | 3.6.4    | De Morgan . . . . .                                 | 7        |
| 057 |          |                                                     |          |
| 058 | 3.7      | Disjunctive syllogism . . . . .                     | 7        |
| 059 |          |                                                     |          |
| 060 | 3.7.1    | Basic schema . . . . .                              | 7        |
| 061 | 3.7.2    | Negative variant . . . . .                          | 7        |
| 062 | 3.7.3    | Complex predicates . . . . .                        | 7        |
| 063 | 3.7.4    | De Morgan . . . . .                                 | 7        |
| 064 |          |                                                     |          |
| 065 | 3.8      | Generalized dilemma . . . . .                       | 7        |
| 066 |          |                                                     |          |
| 067 | 3.8.1    | Basic schema . . . . .                              | 7        |
| 068 | 3.8.2    | Negative variant . . . . .                          | 7        |
| 069 | 3.8.3    | Complex predicates . . . . .                        | 7        |
| 070 | 3.8.4    | De Morgan . . . . .                                 | 7        |
| 071 |          |                                                     |          |
| 072 |          |                                                     |          |
| 073 |          |                                                     |          |
| 074 | <b>4</b> | <b>24 valid types of syllogistic reasoning</b>      | <b>8</b> |
| 075 |          |                                                     |          |
| 076 | <b>5</b> | <b>Self-supervised Euler Net</b>                    | <b>8</b> |
| 077 | 5.1      | Benchmark dataset of Euler Net . . . . .            | 8        |
| 078 | 5.2      | Automatic searching for new training data . . . . . | 8        |
| 079 | 5.3      | Experimental Results . . . . .                      | 8        |
| 080 |          |                                                     |          |
| 081 |          |                                                     |          |

## 1 CODE AND DATASETS

Code and datasets are available at

<https://anonymous.4open.science/r/xEN-AF83/ReadMe.md>.

## 2 PROOF

We adopt definitions of the point and the extension region and three axioms of the connection relation in (Dong, 2008) for the proof.

A point is a geometric entity without extensions, which can be understood as an object that if any two objects connect with it, the two objects will connect with each other.

**Definition 1.** A geometric object  $p$  is a point,  $\mathbf{Pt}(p)$ , is defined as that for any geometric objects  $x, y$ , if  $p$  connects with  $x$  and  $y$ , then  $x$  will connect with  $y$ .

$$\mathbf{Pt}(p) \triangleq \forall x, y[\mathbf{C}(x, p) \wedge \mathbf{C}(y, p) \rightarrow \mathbf{C}(x, y)]$$

The connection relation is governed by the axiom as follows: if two objects connect with each other, for any third object that can be moved to a location where it connects with the first two objects.

**Axiom 1.**  $\forall \mathcal{O}_1, \mathcal{O}_2[\mathbf{C}(\mathcal{O}_1, \mathcal{O}_2) \rightarrow \forall \emptyset \exists \mathcal{O}[\mathcal{O} \in \emptyset \wedge \mathbf{C}(\mathcal{O}_1, \mathcal{O}) \wedge \mathbf{C}(\mathcal{O}_2, \mathcal{O})]]$

Here,  $\emptyset$  is any  $\mathcal{O}$ -shaped object, and objects are only distinguished by their shapes, so  $\emptyset$  is also the type of  $\mathcal{O}$  and we write  $\text{type}(\mathcal{O})$  as the type of  $\mathcal{O}$ . Any two objects  $\mathcal{O}_1, \mathcal{O}_2$  in  $\text{type}(\mathcal{O})$ ,  $\mathcal{O}_1$  can be moved and rotated to completely coincide with  $\mathcal{O}_2$ . Thus,  $\forall \emptyset \exists \mathcal{O}[\dots]$  means for any object, it can be moved and rotated to a place where this object satisfies such and such spatial relations.

The connection relation is self-reflective and symmetric. Any object connects with itself.

108 **Axiom 2.**  $\forall \mathcal{O}[\mathbf{C}(\mathcal{O}, \mathcal{O})]$

109 For any objects  $\mathcal{O}_1, \mathcal{O}_2$ , if  $\mathcal{O}_1$  connects with  $\mathcal{O}_2$ , then  $\mathcal{O}_2$  connects with  $\mathcal{O}_1$ .

110 **Axiom 3.**  $\forall \mathcal{O}_1, \mathcal{O}_2[\mathbf{C}(\mathcal{O}_1, \mathcal{O}_2) \rightarrow \mathbf{C}(\mathcal{O}_2, \mathcal{O}_1)]$

111 A man with a stick can reach objects that are located further away from him. The space that the  
112 man with his stick can reach is the spatial extension of the body. Let  $\mathcal{O}_m$  and  $\mathcal{O}_s$  be the body of the  
113 man and the stick.  $\mathcal{O}_m^{\mathcal{O}_s}$  is the extension of  $\mathcal{O}_m$  by  $\mathcal{O}_s$ , which means any object  $\mathcal{O}_x$  connecting with  
114  $\mathcal{O}_m^{\mathcal{O}_s}$ , the man can move his stick to touch  $\mathcal{O}_x$ .

115 **Definition 2.** An extension of an object  $\mathcal{O}$  with an object  $\mathcal{O}_e$  is the object  $\mathcal{O}^{\mathcal{O}_e}$  such that any object  
116  $\mathcal{O}_x$  connects with  $\mathcal{O}^{\mathcal{O}_e}$ , there is an object  $\mathcal{O}'_e$  that connects with  $\mathcal{O}$  and  $\mathcal{O}_x$ , where  $\mathcal{O}'_e$  and  $\mathcal{O}_e$  are  
117 of the same type, written as  $\mathcal{O}'_e \in \text{type}(\mathcal{O}_e)$ .

$$\mathcal{O}^{\mathcal{O}_e} \triangleq \iota \mathcal{O}[\forall \mathcal{O}_x \mathbf{C}(\mathcal{O}_x, \mathcal{O}) \equiv \exists \mathcal{O}'_e [\mathcal{O}'_e \in \text{type}(\mathcal{O}_e) \wedge \mathbf{C}(\mathcal{O}'_e, \mathcal{O}) \wedge \mathbf{C}(\mathcal{O}'_e, \mathcal{O}_x)]]$$

118 **Lemma 1.** For any  $\mathcal{O}_X$  and  $\mathcal{O}_W$ , if  $\mathcal{O}_X$  connects with  $\mathcal{O}_W$ , there is  $\mathcal{O}_\epsilon$  such that  $\mathcal{O}_\epsilon$  is part of both  
119  $\mathcal{O}_X$  and an extension of  $\mathcal{O}_W$ .

$$\forall \mathcal{O}_W, \mathcal{O}_X[\mathbf{C}(\mathcal{O}_W, \mathcal{O}_X) \rightarrow \exists \mathcal{O}_\epsilon[\mathbf{P}(\mathcal{O}_\epsilon, \mathcal{O}_X) \wedge \mathbf{P}(\mathcal{O}_\epsilon, \mathcal{O}_W^\epsilon)]]$$

120 **Proof (sketch) 1.** Let  $\mathcal{O}_W^\epsilon$  be an extension of  $\mathcal{O}_W$

$$\mathcal{O}_W^\epsilon \triangleq \iota \mathcal{O}[\forall y \mathbf{C}(y, \mathcal{O}) \equiv \exists \epsilon_0[\epsilon_0 \in \text{type}(\epsilon) \wedge \mathbf{C}(\epsilon_0, \mathcal{O}_W) \wedge \mathbf{C}(\epsilon_0, y)]] \quad (1)$$

$$\frac{\mathbf{C}(\mathcal{O}_X, \mathcal{O}_W) \quad (*)}{\forall Z \exists \mathcal{O}_Z[\mathcal{O}_Z \in Z \wedge \mathbf{C}(\mathcal{O}_X, \mathcal{O}_Z) \wedge \mathbf{C}(\mathcal{O}_Z, \mathcal{O}_W)]} \quad (**) \quad \text{Axiom1}$$

$$\frac{(**) \quad \text{Let } Z \text{ be } \text{type}(\epsilon) \quad \mathcal{O}_Z \text{ be } \epsilon_0}{\exists \epsilon_0[\epsilon_0 \in \text{type}(\epsilon) \wedge \mathbf{C}(\mathcal{O}_X, \epsilon_0) \wedge \mathbf{C}(\epsilon_0, \mathcal{O}_W)]} \quad (+)$$

$$\frac{(1) \quad \text{Let } y \text{ be } \mathcal{O}_X}{\iota \mathcal{O}[\mathbf{C}(\mathcal{O}_X, \mathcal{O}) \equiv \exists \epsilon_0[\epsilon_0 \in \text{type}(\epsilon) \wedge \mathbf{C}(\epsilon_0, \mathcal{O}_W) \wedge \mathbf{C}(\epsilon_0, \mathcal{O}_X)]]} \quad (2)$$

$$\frac{(2)}{\mathbf{C}(\mathcal{O}_X, \mathcal{O}_W^\epsilon) \equiv \exists \epsilon_0[\epsilon_0 \in \text{type}(\epsilon) \wedge \mathbf{C}(\epsilon_0, \mathcal{O}_W) \wedge \mathbf{C}(\epsilon_0, \mathcal{O}_X)]} \quad (3) \quad \text{the definition of } \iota$$

$$\frac{(+), (3)}{\mathbf{C}(\mathcal{O}_X, \mathcal{O}_W^\epsilon)} \quad (4)$$

$$\therefore \forall \mathcal{O}_X \mathbf{C}(\mathcal{O}_X, \mathcal{O}_W) \rightarrow \mathbf{C}(\mathcal{O}_X, \mathcal{O}_W^\epsilon). \quad (*) (4)$$

146 So,  $\mathcal{O}_W$  is part of both  $\mathcal{O}_W^\epsilon$ ,  $\mathbf{P}(\mathcal{O}_W, \mathcal{O}_W^\epsilon)$ .

147 Let  $\mathcal{O}_\epsilon$  be  $\mathcal{O}_W^\epsilon \cap \mathcal{O}_X$ . Any  $\mathcal{O}_Y$ , if  $\mathcal{O}_Y$  connects with  $\mathcal{O}_\epsilon$ ,  $\mathcal{O}_Y$  will connect with  $\mathcal{O}_W^\epsilon$  and  $\mathcal{O}_X$ .  
148 Therefore  $\mathcal{O}_\epsilon$  is part of  $\mathcal{O}_X$  and  $\mathcal{O}_W^\epsilon$ .

$$\forall \mathcal{O}_W, \mathcal{O}_X[\mathbf{C}(\mathcal{O}_W, \mathcal{O}_X) \rightarrow \exists \mathcal{O}_\epsilon[\mathbf{P}(\mathcal{O}_\epsilon, \mathcal{O}_X) \wedge \mathbf{P}(\mathcal{O}_\epsilon, \mathcal{O}_W^\epsilon)]]$$

152  $\square$

153 **Theorem 1.** If over-smoothing (all output feature embeddings are the same), these output embed-  
154 dings will be points.

155 **Proof (sketch) 2.** We consider part-whole relations among feature embeddings and for any  $\mathcal{O}_V$  and  
156  $\mathcal{O}_W$ , if  $\mathcal{O}_V$  is a part of  $\mathcal{O}_W$ ,  $\mathcal{O}_V$  and  $\mathcal{O}_W$  will coincide,  $\mathbf{EQ}(\mathcal{O}_V, \mathcal{O}_W)$ . We prove that  $\mathcal{O}_W$  is a  
157 point  $\mathbf{Pt}(\mathcal{O}_W)$ .

158 For any  $\mathcal{O}_X$ , if  $\mathcal{O}_X$  connects with  $\mathcal{O}_W$ , there is a region  $\mathcal{O}_\epsilon$  such that  $\mathcal{O}_\epsilon$  is part of  $\mathcal{O}_X$  and part of  
159 an extension of  $\mathcal{O}_W$  (Lemma 1), namely,

$$\forall \mathcal{O}_W, \mathcal{O}_X[\mathbf{C}(\mathcal{O}_W, \mathcal{O}_X) \rightarrow \exists \mathcal{O}_\epsilon[\mathbf{P}(\mathcal{O}_\epsilon, \mathcal{O}_X) \wedge \mathbf{P}(\mathcal{O}_\epsilon, \mathcal{O}_W^\epsilon)]] \quad (5)$$

As any feature coincides with its any part, we have  $\mathbf{EQ}(\mathcal{O}_{\epsilon_0}, \mathcal{O}_{W^\epsilon})$  and  $\mathbf{EQ}(\mathcal{O}_{\epsilon_0}, \mathcal{O}_X)$ , so

$$\mathbf{P}(\mathcal{O}_{W^\epsilon}, \mathcal{O}_{\epsilon_0}) \wedge \mathbf{P}(\mathcal{O}_{\epsilon_0}, \mathcal{O}_X) \quad (6)$$

$\frac{\mathbf{P}(\mathcal{O}_{W^\epsilon}, \mathcal{O}_{\epsilon_0}) \wedge \mathbf{P}(\mathcal{O}_{\epsilon_0}, \mathcal{O}_X)}{\mathbf{P}(\mathcal{O}_{W^\epsilon}, \mathcal{O}_X)}$  the transitive relation of  $\mathbf{P}$

$$\frac{(6) \quad (7)}{\mathbf{P}(\mathcal{O}_{W^\epsilon}, \mathcal{O}_X)} \quad (8)$$

$$\frac{(5) \quad (7)}{\forall \mathcal{O}_X \mathbf{C}(\mathcal{O}_W, \mathcal{O}_X) \rightarrow \mathbf{P}(\mathcal{O}_{W^\epsilon}, \mathcal{O}_X)} \quad (8)$$

$$\frac{(8) \quad \mathbf{P}(\mathcal{O}_{W^\epsilon}, \mathcal{O}_X) \rightarrow \mathbf{P}(\mathcal{O}_W, \mathcal{O}_X)}{\forall \mathcal{O}_X \mathbf{C}(\mathcal{O}_W, \mathcal{O}_X) \rightarrow \mathbf{P}(\mathcal{O}_W, \mathcal{O}_X)} \quad (9)$$

$$\frac{\mathbf{P}(\mathcal{O}_W, \mathcal{O}_X)}{\forall \mathcal{O}_Y [\mathbf{C}(\mathcal{O}_Y, \mathcal{O}_W) \rightarrow \mathbf{C}(\mathcal{O}_Y, \mathcal{O}_X)]} \quad (10) \text{ definition of } \mathbf{P}$$

$$\frac{(9) \quad (10)}{\forall \mathcal{O}_X [\mathbf{C}(\mathcal{O}_W, \mathcal{O}_X) \rightarrow \forall \mathcal{O}_Y [\mathbf{C}(\mathcal{O}_Y, \mathcal{O}_W) \rightarrow \mathbf{C}(\mathcal{O}_Y, \mathcal{O}_X)]]} \quad (11) \text{ rewrite } \mathbf{P}$$

(11) is equivalent with

$$\forall \mathcal{O}_X, \mathcal{O}_Y [\mathbf{C}(\mathcal{O}_X, \mathcal{O}_W) \wedge \mathbf{C}(\mathcal{O}_Y, \mathcal{O}_W) \rightarrow \mathbf{C}(\mathcal{O}_X, \mathcal{O}_Y)] \quad (12)$$

$\frac{(12)}{\mathcal{O}_W \text{ is a point}}$  Definition of  $\mathbf{Pt}$  □

### 3 VARIOUS FORMS OF LOGICAL REASONING

We list 36 forms of logical reasoning that have the root on syllogistic reasoning (Betz et al., 2021).

#### 3.1 GENERALIZED MODUS PONENS

##### 3.1.1 BASIC SCHEMA

$$\frac{\forall x F(x) \rightarrow G(x) \quad F(a)}{G(a)} \quad \therefore$$

##### 3.1.2 NEGATIVE VARIANT

$$\frac{\forall x F(x) \rightarrow \neg G(x) \quad F(a)}{\neg G(a)} \quad \therefore$$

##### 3.1.3 COMPLEX PREDICATES

$$\frac{\forall x F(x) \wedge H(x) \rightarrow G(x) \quad F(a) \quad H(a)}{G(a)} \quad \therefore$$

##### 3.1.4 DE MORGAN

$$\frac{\forall x \neg [F(x) \vee H(x)] \rightarrow G(x) \quad \neg F(a) \quad \neg H(a)}{G(a)} \quad \therefore$$

## 216 3.2 GENERALIZED CONTRAPOSITION

217  
218 3.2.1 BASIC SCHEMA

219  
220 
$$\frac{\forall x F(x) \rightarrow \neg G(x)}{\forall x G(x) \rightarrow \neg F(x)} \quad \therefore$$

## 222 3.2.2 NEGATIVE VARIANT

223  
224 
$$\frac{\forall x F(x) \rightarrow G(x)}{\forall x \neg G(x) \rightarrow \neg F(x)} \quad \therefore$$

## 226 3.2.3 COMPLEX PREDICATES

227  
228 
$$\frac{\forall x [F(x) \wedge H(x)] \rightarrow \neg G(x)}{\forall x G(x) \rightarrow \neg [F(x) \wedge H(x)]} \quad \therefore$$

## 231 3.2.4 DE MORGAN

232  
233 
$$\frac{\forall x [F(x) \wedge H(x)] \rightarrow \neg G(x)}{\forall x G(x) \rightarrow \neg F(x) \vee \neg H(x)} \quad \therefore$$

## 235 3.3 HYPOTHETICAL SYLLOGISM 1

## 237 3.3.1 BASIC SCHEMA

238  
239 
$$\frac{\forall x F(x) \rightarrow G(x)}{\forall x G(x) \rightarrow H(x)} \quad \therefore$$

## 242 3.3.2 NEGATIVE VARIANT

243  
244 
$$\frac{\forall x F(x) \rightarrow \neg G(x)}{\forall x \neg G(x) \rightarrow H(x)} \quad \therefore$$

## 247 3.3.3 COMPLEX PREDICATES

248  
249 
$$\frac{\forall x F(x) \rightarrow G(x)}{\forall x F(x) \rightarrow I(x)} \quad \therefore$$

## 254 3.3.4 DE MORGAN

255  
256 
$$\frac{\forall x \neg F(x) \wedge \neg I(x) \rightarrow G(x)}{\forall x G(x) \rightarrow H(x)} \quad \therefore$$

## 259 3.4 HYPOTHETICAL SYLLOGISM 2

## 261 3.4.1 BASIC SCHEMA

262  
263 
$$\frac{\forall x F(x) \rightarrow G(x)}{\forall x \neg H(x) \rightarrow \neg G(x)} \quad \therefore$$

## 266 3.4.2 NEGATIVE VARIANT

267  
268 
$$\frac{\forall x F(x) \rightarrow \neg G(x)}{\forall x \neg H(x) \rightarrow G(x)} \quad \therefore$$

## 270 3.4.3 COMPLEX PREDICATES

271

272

273

274

275

276

277

278

279

280

281

282

283

284

285

286

287

288

289

290

291

292

293

294

295

296

297

298

299

300

301

302

303

304

305

306

307

308

309

310

311

312

313

314

315

316

317

318

319

320

321

322

323

## 3.4.4 DE MORGAN

$$\frac{\forall x F(x) \rightarrow G(x) \vee I(x) \quad \forall x H(x) \rightarrow \neg[G(x) \vee I(x)]}{\forall x F(x) \rightarrow H(x)} \quad \therefore$$

## 3.5 HYPOTHETICAL SYLLOGISM 3

## 3.5.1 BASIC SCHEMA

$$\frac{\forall x F(x) \rightarrow G(x) \quad \exists x H(x) \wedge \neg G(x)}{\exists x H(x) \wedge \neg F(x)} \quad \therefore$$

## 3.5.2 NEGATIVE VARIANT

$$\frac{\forall x \neg F(x) \rightarrow G(x) \quad \exists x H(x) \wedge \neg G(x)}{\exists x H(x) \wedge F(x)} \quad \therefore$$

## 3.5.3 COMPLEX PREDICATES

$$\frac{\forall x F(x) \rightarrow G(x) \quad \forall x F(x) \rightarrow I(x) \quad \exists x H(x) \wedge \neg[G(x) \wedge I(x)]}{\exists x H(x) \wedge \neg F(x)} \quad \therefore$$

## 3.5.4 DE MORGAN

$$\frac{\forall x F(x) \rightarrow G(x) \quad \forall x F(x) \rightarrow I(x) \quad \exists x H(x) \wedge [\neg G(x) \vee \neg I(x)]}{\exists x H(x) \wedge \neg F(x)} \quad \therefore$$

## 3.6 GENERALIZED MODUS TOLLENS

## 3.6.1 BASIC SCHEMA

$$\frac{\forall x F(x) \rightarrow G(x) \quad \neg G(a)}{\neg F(a)} \quad \therefore$$

## 3.6.2 NEGATIVE VARIANT

$$\frac{\forall x F(x) \rightarrow \neg G(x) \quad G(a)}{\neg F(a)} \quad \therefore$$

## 3.6.3 COMPLEX PREDICATES

$$\frac{\forall x F(x) \rightarrow G(x) \wedge H(x) \quad \neg G(a)}{\neg F(a)} \quad \therefore$$

## 324 3.6.4 DE MORGAN

325

326

327

328

329

330

331

332

## 3.7 DISJUNCTIVE SYLLOGISM

## 3.7.1 BASIC SCHEMA

333

334

335

336

337

## 3.7.2 NEGATIVE VARIANT

338

339

340

341

## 3.7.3 COMPLEX PREDICATES

343

344

345

346

347

## 3.7.4 DE MORGAN

349

350

351

352

## 3.8 GENERALIZED DILEMMA

354

## 3.8.1 BASIC SCHEMA

356

357

358

359

360

## 3.8.2 NEGATIVE VARIANT

362

363

364

365

366

## 3.8.3 COMPLEX PREDICATES

368

369

370

371

372

## 3.8.4 DE MORGAN

373

374

375

376

377

$$\frac{\forall x F(x) \rightarrow G(x) \wedge H(x) \quad \neg G(a) \vee \neg H(a)}{\neg F(a) \quad \therefore}$$

$$\frac{\forall x F(x) \rightarrow G(x) \vee H(x) \quad \forall x F(x) \rightarrow \neg G(x)}{\forall x F(x) \rightarrow H(x) \quad \therefore}$$

$$\frac{\forall x F(x) \rightarrow G(x) \vee H(x) \quad \forall x G(x) \rightarrow \neg F(x)}{\forall x F(x) \rightarrow H(x) \quad \therefore}$$

$$\frac{\forall x F(x) \rightarrow G(x) \vee H(x) \vee I(x) \quad \forall x F(x) \rightarrow \neg G(x) \quad \forall x F(x) \rightarrow \neg I(x)}{\forall x F(x) \rightarrow H(x) \quad \therefore}$$

$$\frac{\forall x F(x) \wedge I(x) \rightarrow G(x) \vee H(x) \quad \forall x G(x) \rightarrow \neg F(x) \vee \neg I(x)}{\forall x F(x) \wedge I(x) \rightarrow H(x) \quad \therefore}$$

$$\frac{\forall x F(x) \rightarrow G(x) \vee H(x) \quad \forall x G(x) \rightarrow J(x) \quad \forall x H(x) \rightarrow J(x)}{\forall x F(x) \rightarrow J(x) \quad \therefore}$$

$$\frac{\forall x F(x) \rightarrow G(x) \vee H(x) \quad \forall x J(x) \rightarrow \neg G(x) \quad \forall x J(x) \rightarrow \neg H(x)}{\forall x F(x) \rightarrow J(x) \quad \therefore}$$

$$\frac{\forall x F(x) \rightarrow G(x) \vee H(x) \vee I(x) \quad \forall x J(x) \rightarrow \neg G(x) \quad \forall x J(x) \rightarrow \neg H(x)}{\forall x F(x) \rightarrow J(x) \vee I(x) \quad \therefore}$$

$$\frac{\forall x F(x) \rightarrow \neg[G(x) \wedge H(x)] \quad \forall x \neg G(x) \rightarrow J(x) \quad \forall x \neg H(x) \rightarrow J(x)}{\forall x F(x) \rightarrow J(x) \quad \therefore}$$

## 4 24 VALID TYPES OF SYLLOGISTIC REASONING

Each valid syllogism is given a name whose vowels indicate types of moods, e.g., ‘CELARENT’ indicates types of moods are ‘E’, ‘A’, ‘E’, respectively. ‘A’ for *universal affirmative*, all  $X$  are  $Y$ , ‘I’ for *particular affirmative*, some  $X$  are  $Y$ ; ‘E’ for *universal negative*, no  $X$  are  $Y$ , ‘O’ for *particular negative*, some  $X$  are not  $Y$ . All 24 valid types of syllogistic reasoning is listed in Table 1.

## 5 SELF-SUPERVISED EULER NET

### 5.1 BENCHMARK DATASET OF EULER NET

Data sets of Euler Net are randomly created as follows. Let  $R_{min}$  and  $R_{max}$  be the pre-defined values denoting the minimum and the maximum lengths of radii. Let  $\odot_A(O_A, R_A)$  represent circle A with the central point  $O_A$  and the radius  $R_A$ . The Euler diagram where  $\odot_A(O_A, R_A)$  is inside  $\odot_B(O_B, R_B)$  is generated as follows:  $R_A$  is randomly chosen between  $R_{min}$  and  $R_{max}$ ;  $R_B$  is randomly chosen between  $\lambda_1 R_{min}$  and  $\lambda_2 R_A$  ( $0 < \lambda_1 < \lambda_2 < 1$ );  $O_A$  is fixed to  $(R_{min} + R_{max}, R_{min} + R_{max})$ ;  $O_B$  is set to  $O_A + (\delta_x, \delta_y)$ , in which  $\delta_x$  and  $\delta_y$  are randomly chosen between  $(R_B - R_A)/2$  and  $(R_A - R_B)/2$ . Other Euler diagrams are generated in similar ways. In total, 96000 input-output pairs are created, which are separated into 80000 pairs for training, 8000 for validation, and 8000 for testing. Euler Net reached 99.8% accuracy in testing data.

### 5.2 AUTOMATIC SEARCHING FOR NEW TRAINING DATA

As illustrated in Figure 5 in our submitted paper, in each iteration, our self-supervised Euler Net firstly searches for new training data. The size of the newly created training data set in each iteration is set to 10,000. In the procedure of random search, the central point and the radius of a circle are totally random. We set two restrictions as follows: (1) circles are complete; (2) the minimum radius is set to 0.1. We allow all possible combinations between two circles. Following these criteria, we created two new testing data sets  $\mathcal{D}_1$  and  $\mathcal{D}_2$ :  $\mathcal{D}_1$  with one circle (half of input images in  $\mathcal{D}_1$  have green circles, the rest of inputs are one red circle, one blue circle),  $\mathcal{D}_2$  with two circles, and the size of  $\mathcal{D}_2$  is 9 times larger than the size of  $\mathcal{D}_1$ . In each iteration, the newly trained Euler Net is tested with  $\mathcal{D}_T = \mathcal{D}_1 \cup \mathcal{D}_2$ . We set the maximum iteration number to 20.

### 5.3 EXPERIMENTAL RESULTS

We fed  $\mathcal{D}_T$  to the original Euler Net, which achieved an accuracy of 56.0% – this means that the original 99.8% accuracy of Euler Net is only for **the benchmark datasets**. Through repeated training of newly created data sets, Euler Net improves its accuracy. It reaches a peak value of 97.8% in accuracy after the 19<sup>th</sup> iteration.

## REFERENCES

- Gregor Betz, Christian Voigt, and Kyle Richardson. Critical thinking for language models. In Sina Zarrieß, Johan Bos, Rik van Noord, and Lasha Abzianidze (eds.), *Proceedings of the 14th International Conference on Computational Semantics (IWCS)*, pp. 63–75, Groningen, The Netherlands (online), June 2021. Association for Computational Linguistics. URL <https://aclanthology.org/2021.iwcs-1.7>.
- T. Dong. A Comment on RCC: from RCC to RCC<sup>++</sup>. *Journal of Philosophical Logic*, 37(4): 319–352, 2008.



Table 1: List of all valid syllogisms, each is mapped to a qualitative spatial statement.

| Num | Name      | Premise                                | Conclusion           | Qualitative spatial relations statement                                                                                        |
|-----|-----------|----------------------------------------|----------------------|--------------------------------------------------------------------------------------------------------------------------------|
| 1   | BARBARA   | all $s$ are $m$ , all $m$ are $p$      | all $s$ are $p$      | $P(\mathcal{O}_s, \mathcal{O}_m) \wedge P(\mathcal{O}_m, \mathcal{O}_p) \rightarrow P(\mathcal{O}_s, \mathcal{O}_p)$           |
| 2   | BARBARI   | all $s$ are $m$ , all $m$ are $p$      | some $s$ are $p$     | $P(\mathcal{O}_s, \mathcal{O}_m) \wedge P(\mathcal{O}_m, \mathcal{O}_p) \rightarrow \neg D(\mathcal{O}_s, \mathcal{O}_p)$      |
| 3   | CELARENT  | no $m$ is $p$ , all $s$ are $m$        | no $s$ is $p$        | $D(\mathcal{O}_m, \mathcal{O}_p) \wedge P(\mathcal{O}_s, \mathcal{O}_m) \rightarrow D(\mathcal{O}_s, \mathcal{O}_p)$           |
| 4   | CESARE    | no $p$ is $m$ , all $s$ are $m$        | no $s$ is $p$        | $D(\mathcal{O}_p, \mathcal{O}_m) \wedge P(\mathcal{O}_s, \mathcal{O}_m) \rightarrow D(\mathcal{O}_s, \mathcal{O}_p)$           |
| 5   | CALEMES   | all $p$ are $m$ , no $m$ is $s$        | no $s$ is $p$        | $P(\mathcal{O}_p, \mathcal{O}_m) \wedge D(\mathcal{O}_m, \mathcal{O}_s) \rightarrow D(\mathcal{O}_s, \mathcal{O}_p)$           |
| 6   | CAMESTRES | all $p$ are $m$ , no $s$ is $m$        | no $s$ is $p$        | $P(\mathcal{O}_p, \mathcal{O}_m) \wedge D(\mathcal{O}_s, \mathcal{O}_m) \rightarrow D(\mathcal{O}_s, \mathcal{O}_p)$           |
| 7   | DARII     | all $m$ are $p$ , some $s$ are $m$     | some $s$ are $p$     | $P(\mathcal{O}_m, \mathcal{O}_p) \wedge \neg D(\mathcal{O}_s, \mathcal{O}_m) \rightarrow \neg D(\mathcal{O}_s, \mathcal{O}_p)$ |
| 8   | DATISI    | all $m$ are $p$ , some $m$ are $s$     | some $s$ are $p$     | $P(\mathcal{O}_m, \mathcal{O}_p) \wedge \neg D(\mathcal{O}_m, \mathcal{O}_s) \rightarrow \neg D(\mathcal{O}_s, \mathcal{O}_p)$ |
| 9   | DARAPTI   | all $m$ are $s$ , all $m$ are $p$      | some $s$ are $p$     | $P(\mathcal{O}_m, \mathcal{O}_s) \wedge P(\mathcal{O}_m, \mathcal{O}_p) \rightarrow \neg D(\mathcal{O}_s, \mathcal{O}_p)$      |
| 10  | DISAMIS   | some $m$ are $p$ , all $m$ are $s$     | some $s$ are $p$     | $\neg D(\mathcal{O}_m, \mathcal{O}_p) \wedge P(\mathcal{O}_m, \mathcal{O}_s) \rightarrow \neg D(\mathcal{O}_s, \mathcal{O}_p)$ |
| 11  | DIMATIS   | some $p$ are $m$ , all $m$ are $s$     | some $s$ are $p$     | $\neg D(\mathcal{O}_p, \mathcal{O}_m) \wedge P(\mathcal{O}_m, \mathcal{O}_s) \rightarrow \neg D(\mathcal{O}_s, \mathcal{O}_p)$ |
| 12  | BAROCO    | all $p$ is $m$ , some $s$ are not $m$  | some $s$ are not $p$ | $P(\mathcal{O}_p, \mathcal{O}_m) \wedge \neg P(\mathcal{O}_s, \mathcal{O}_m) \rightarrow \neg P(\mathcal{O}_s, \mathcal{O}_p)$ |
| 13  | CESARO    | no $p$ is $m$ , all $s$ are $m$        | some $s$ are not $p$ | $D(\mathcal{O}_p, \mathcal{O}_m) \wedge P(\mathcal{O}_s, \mathcal{O}_m) \rightarrow \neg P(\mathcal{O}_s, \mathcal{O}_p)$      |
| 14  | CAMESTROS | all $s$ are $m$ , no $m$ is $p$        | some $s$ are not $p$ | $P(\mathcal{O}_s, \mathcal{O}_m) \wedge D(\mathcal{O}_m, \mathcal{O}_p) \rightarrow \neg P(\mathcal{O}_s, \mathcal{O}_p)$      |
| 15  | CELARONT  | no $s$ is $m$ , all $p$ are $m$        | some $s$ are not $p$ | $D(\mathcal{O}_s, \mathcal{O}_m) \wedge P(\mathcal{O}_p, \mathcal{O}_m) \rightarrow \neg P(\mathcal{O}_s, \mathcal{O}_p)$      |
| 16  | CALEMOS   | all $p$ are $m$ , no $m$ is $s$        | some $s$ are not $p$ | $P(\mathcal{O}_p, \mathcal{O}_m) \wedge D(\mathcal{O}_m, \mathcal{O}_s) \rightarrow \neg P(\mathcal{O}_s, \mathcal{O}_p)$      |
| 17  | BOCARDI   | some $m$ are not $p$ , all $m$ are $s$ | some $s$ are not $p$ | $\neg P(\mathcal{O}_m, \mathcal{O}_p) \wedge P(\mathcal{O}_m, \mathcal{O}_s) \rightarrow \neg P(\mathcal{O}_s, \mathcal{O}_p)$ |
| 18  | BAMALIP   | all $m$ are $s$ , all $p$ are $m$      | some $s$ are $p$     | $P(\mathcal{O}_m, \mathcal{O}_s) \wedge P(\mathcal{O}_p, \mathcal{O}_m) \rightarrow \neg D(\mathcal{O}_s, \mathcal{O}_p)$      |
| 19  | FERIO     | some $s$ are $m$ , no $m$ is $p$       | some $s$ are not $p$ | $\neg D(\mathcal{O}_s, \mathcal{O}_m) \wedge D(\mathcal{O}_m, \mathcal{O}_p) \rightarrow \neg P(\mathcal{O}_s, \mathcal{O}_p)$ |
| 20  | FESTINO   | some $s$ are $m$ , no $p$ is $m$       | some $s$ are not $p$ | $\neg D(\mathcal{O}_s, \mathcal{O}_m) \wedge D(\mathcal{O}_p, \mathcal{O}_m) \rightarrow \neg P(\mathcal{O}_s, \mathcal{O}_p)$ |
| 21  | FERISON   | some $m$ are $s$ , no $m$ is $p$       | some $s$ are not $p$ | $\neg D(\mathcal{O}_m, \mathcal{O}_s) \wedge D(\mathcal{O}_m, \mathcal{O}_p) \rightarrow \neg P(\mathcal{O}_s, \mathcal{O}_p)$ |
| 22  | FRESISON  | some $m$ are $s$ , no $p$ is $m$       | some $s$ are not $p$ | $\neg D(\mathcal{O}_m, \mathcal{O}_s) \wedge D(\mathcal{O}_p, \mathcal{O}_m) \rightarrow \neg P(\mathcal{O}_s, \mathcal{O}_p)$ |
| 23  | FELAPTON  | all $m$ are $s$ , no $m$ is $p$        | some $s$ are not $p$ | $P(\mathcal{O}_m, \mathcal{O}_s) \wedge D(\mathcal{O}_m, \mathcal{O}_p) \rightarrow \neg P(\mathcal{O}_s, \mathcal{O}_p)$      |
| 24  | FESAPO    | all $m$ are $s$ , no $p$ is $m$        | some $s$ are not $p$ | $P(\mathcal{O}_m, \mathcal{O}_s) \wedge D(\mathcal{O}_p, \mathcal{O}_m) \rightarrow \neg P(\mathcal{O}_s, \mathcal{O}_p)$      |
